# Supplementary material
Source: ML conference proceedings conference paper supplement (https://openreview.net/forum?id=urueR03mkng)
Supplement: supplementary_material [file attachment]

# 1 Appendix

## 1.1 80/20 split

The 80/20 split mentioned in the body of the paper refers to the fact that for general tasks, unless otherwise specified, we generated 10,000 scenarios according to the training regime above specified, and then took a random sample of 80% of those scenarios and placed them in a training set, and placed the remaining, unsampled scenarios into a validation set. Thus, training sets and validation sets cover the same structural domain unless some other validation regime is specified.

## 1.2 Examples of Object Name Lists

In table 1, we provide more examples of each of the lists of candidates referenced in Section 4.

Table 1:

| List Name                      | Examples                                                 |
|--------------------------------|----------------------------------------------------------|
| All Train Nouns                | pockets, hallelujah, cooktop, sunglasses, nonaction ...  |
| 2000 Common Train Nouns        | people, time, way, man, world, year, thing, president... |
| 20 Concrete Train Nouns        | strawberry, horseshoe, sardine, passport, grape, oat ... |
| 200 Concrete Train Nouns       | escalator, strawberry, bathrobe, hubcap, greyhound ...   |
| 2000 Concrete Train Nouns      | tongs, saxophone, umbrella, strawberry, bathrobe ...     |
| 2000 Train Nouns               | flubs, dependant, sentimentalists, liberalizations ...   |
| All Validation Nouns           | injuries, yellowtail, electromagnetism, fussiness ...    |
| 2000 Concrete Validation Nouns | watchband, flashlight, tractor, handkerchief, camera ... |
| 2000 Common Validation Nouns   | life, day, state, family, place, city, times, number ... |
| Verbs                          | talk shop, whip up, uncrate, sleep late, speculate ...   |
| To Verbs                       | to talk shop, to whip up, to uncrate, to sleep late ...  |
| Random Strings                 | cbmmj3a, 27qu9nrcfv, u8njdfg7, 5g4gnzv7m, n6lnl ...      |

## 1.3 More Examples of Task Range

Here we include examples both on the more difficult and easier ends of the task domain.

Table 2:

| Task Name                     | Prefix                                                                                                                                                                                                                                                                                                                                                                                                          | Target                                                                                                                                                                                                                                                                                                                                            |
|-------------------------------|-----------------------------------------------------------------------------------------------------------------------------------------------------------------------------------------------------------------------------------------------------------------------------------------------------------------------------------------------------------------------------------------------------------------|---------------------------------------------------------------------------------------------------------------------------------------------------------------------------------------------------------------------------------------------------------------------------------------------------------------------------------------------------|
| Containers<br>Short           | The bin contains a backbeats. The bag contains an electrics. Took an electrics from the bag and put it into the bin.                                                                                                                                                                                                                                                                                            | The bin contains a backbeats and an electrics. The bag contains no objects.                                                                                                                                                                                                                                                                       |
| Containers<br>Long            | The bowl contains a cormorant, a rewritings, and a lodger. The case contains a consortia and an appendices. The bag contains an orishas, a creamers, a guv, and a steamroller. The tub contains a wont, a steers, an inception, a simians, an assimilation, and a scrapple. The jar contains a walk-outs, a gentleness, a rhetoric, and a preserves. Took an appendices from the case and put it into the bowl. | The bowl contains a cormorant, a rewritings, a lodger, and an appendices. The case contains a consortia. The bag contains an orishas, a creamers, a guv, and a steamroller. The tub contains a wont, a steers, an inception, a simians, an assimilation, and a scrapple. The jar contains a walk-outs, a gentleness, a rhetoric, and a preserves. |
| Navigation<br>Short           | The foyer is to the west of the living room. The antechamber is to the south of the living room. To get from the antechamber to the living room, you must go                                                                                                                                                                                                                                                    | to the north.                                                                                                                                                                                                                                                                                                                                     |
| Navigation<br>Long            | The kitchen is to the south of the family room. The basement is to the west of the kitchen. The great room is to the north of the basement. The antechamber is to the north of the great room. The conservatory is to the north of the family room. The storeroom is to the west of the great room. To get from the family room to the storeroom, you must go                                                   | to the south, then to the west, then to the north, then to the west.                                                                                                                                                                                                                                                                              |
| Navigation<br>Result<br>Short | The laundry room is to the east of the great room. The den is to the east of the laundry room. If you start in the laundry room and go to the west, you will end in the                                                                                                                                                                                                                                         | great room                                                                                                                                                                                                                                                                                                                                        |

*continued on next page...*

...continued from last page.

| Task Name                     | Prefix                                                                                                                                                                                                                                                                                                                                                                                                                                                                                                                        | Target                                                                                                                               |
|-------------------------------|-------------------------------------------------------------------------------------------------------------------------------------------------------------------------------------------------------------------------------------------------------------------------------------------------------------------------------------------------------------------------------------------------------------------------------------------------------------------------------------------------------------------------------|--------------------------------------------------------------------------------------------------------------------------------------|
| Navigation<br>Result<br>Long  | The mud room is to the south of the boiler room. The screen porch is to the west of the boiler room. The study is to the south of the mud room. The utility room is to the west of the study. The cloakroom is to the north of the mud room. The family room is to the west of the screen porch. The tea room is to the south of the cloakroom. If you start in the family room and go to the east twice, then to the south, then to the north, then to the south, you will end in the                                        | tea room                                                                                                                             |
| Hard<br>Object /<br>Composite | The loft is to the west of the family room. The powder room is to the east of the family room. The sitting room is to the north of the loft. The garage is to the east of the loft. The study is to the east of the sitting room. The nursery is to the east of the study. There is a container in the nursery containing a book. There is a carton in the garage containing a mushroom, and a celery. Took a book from the container in the nursery. Went to the west twice, then to the south, then to the east. Placed it. | There is a container in the nursery containing nothing. There is a carton in the garage containing a mushroom, a celery, and a book. |

## 1.4 Examples of Matches and Failures

Table 3: Matches

| Task Name        | Prefix                                                                                                                                                                                                                                                                                                                                         | Target                                                                                                                                                                                                                                                                                        | Prediction                                                                                                                                                                                                                                                                                    |
|------------------|------------------------------------------------------------------------------------------------------------------------------------------------------------------------------------------------------------------------------------------------------------------------------------------------------------------------------------------------|-----------------------------------------------------------------------------------------------------------------------------------------------------------------------------------------------------------------------------------------------------------------------------------------------|-----------------------------------------------------------------------------------------------------------------------------------------------------------------------------------------------------------------------------------------------------------------------------------------------|
| Containers       | the crate contains a ligament and a vee. the bag contains a sodium, a meticulousness, a conman, a cascade, and a sundeck. the box contains a telegraphs. the bin contains a bunts, a lacquer, a canto, and a wheelchairs. the jar contains a suedes, a punishments, a parchments, and a webs. took a webs from the jar and put it into the bin | the crate contains a ligament and a vee. the bag contains a sodium, a meticulousness, a conman, a cascade, and a sundeck. the box contains a telegraphs. the bin contains a bunts, a lacquer, a canto, a wheelchairs, and a webs. the jar contains a suedes, a punishments, and a parchments. | the crate contains a ligament and a vee. the bag contains a sodium, a meticulousness, a conman, a cascade, and a sundeck. the box contains a telegraphs. the bin contains a bunts, a lacquer, a canto, a wheelchairs, and a webs. the jar contains a suedes, a punishments, and a parchments. |
| Navigation Route | the powder room is to the east of the living room. the drawing room is to the south of the powder room. the boiler room is to the west of the living room. the solarium is to the south of the boiler room. to get from the powder room to the boiler room, you must go                                                                        | to the west, then to the west.                                                                                                                                                                                                                                                                | to the west, then to the west.                                                                                                                                                                                                                                                                |

*continued on next page...*

...continued from last page.

| Task Name         | Prefix                                                                                                                                                                                                                                                                                                                                                                                                  | Target                                                                                                                                                       | Prediction                                                                                                                                                   |
|-------------------|---------------------------------------------------------------------------------------------------------------------------------------------------------------------------------------------------------------------------------------------------------------------------------------------------------------------------------------------------------------------------------------------------------|--------------------------------------------------------------------------------------------------------------------------------------------------------------|--------------------------------------------------------------------------------------------------------------------------------------------------------------|
| Navigation Result | the garage is to the north of the conservatory. the drawing room is to the west of the garage. the mud room is to the east of the garage. the screen porch is to the west of the drawing room. the parlor is to the north of the screen porch. the cellar is to the north of the mud room. if you start in the screen porch and go to the east, then to the east, then to the east, you will end in the | mudroom.                                                                                                                                                     | mudroom.                                                                                                                                                     |
| Hard Object       | the cellar is to the north of the solarium. the conservatory is to the east of the solarium. the powder room is to the east of the cellar. there is a box in the cellar containing nothing. there is a carton in the cellar containing nothing. there is a sack in the cellar containing a marshmallow. didn't take anything.                                                                           | there is a box in the cellar containing nothing. there is a carton in the cellar containing nothing. there is a sack in the cellar containing a marshmallow. | there is a box in the cellar containing nothing. there is a carton in the cellar containing nothing. there is a sack in the cellar containing a marshmallow. |

Table 4: Failures

| Task Name        | Prefix                                                                                                                                                                                                                                                                                                                                                                                                     | Target                                                                                                                                                                                                                                                             | Prediction                                                                                                                                                                                                                                                                                                                                         |
|------------------|------------------------------------------------------------------------------------------------------------------------------------------------------------------------------------------------------------------------------------------------------------------------------------------------------------------------------------------------------------------------------------------------------------|--------------------------------------------------------------------------------------------------------------------------------------------------------------------------------------------------------------------------------------------------------------------|----------------------------------------------------------------------------------------------------------------------------------------------------------------------------------------------------------------------------------------------------------------------------------------------------------------------------------------------------|
| Containers       | the tub contains a laundering, a nigiri, and a militiamen. the basket contains a finesse, an expectancies, and an annoyance. the bin contains a yarmulke and a scotomas. the bag contains an archdioceses, a flair, a phenoms, a wimples, a buyback, and a mockeries. the case contains a purity, a double-talk, an altar, a voles, and a mini-dress. took a scotomas from the bin and put it into the tub | the tub contains a laundering, a nigiri, a militiamen, and a scotomas. the basket contains a finesse, an expectancies, and an annoyance. the bin contains a yarmulke. the bag contains an archdioceses, a flair, a phenoms, a wimples, a buyback, and a mockeries. | the tub contains a laundering, a nigiri, a militiamen, and a scotomas. the basket contains a finesse, an expectancies, and an annoyance. the bin contains a yarmulke. the bag contains an archdioceses, a flair, a phenoms, a wimples, a buyback, and a mockeries. the case contains a purity, a double-talk, an altar, a voles, and a mini-dress. |
| Navigation Route | the bedroom is to the south of the game room. the utility room is to the east of the game room. the cellar is to the west of the bedroom. the bathroom is to the west of the cellar. the ballroom is to the north of the utility room. the basement is to the south of the cellar. the great room is to the west of the bathroom. to get from the basement to the ballroom, you must go                    | to the north, then to the east, then to the east, then to the north.                                                                                                                                                                                               | to the north, then to the east, then to the north, then to the east, then to the north.                                                                                                                                                                                                                                                            |

*continued on next page...*

...continued from last page.

| Task Name         | Prefix                                                                                                                                                                                                                                                                                                                                                                                                                                                                                                 | Target                                                                                                                                                                                                                                      | Prediction                                                                                                                                                                                                                     |
|-------------------|--------------------------------------------------------------------------------------------------------------------------------------------------------------------------------------------------------------------------------------------------------------------------------------------------------------------------------------------------------------------------------------------------------------------------------------------------------------------------------------------------------|---------------------------------------------------------------------------------------------------------------------------------------------------------------------------------------------------------------------------------------------|--------------------------------------------------------------------------------------------------------------------------------------------------------------------------------------------------------------------------------|
| Navigation Result | the solarium is to the north of the conservatory. the garden room is to the south of the conservatory. the antechamber is to the south of the garden room. if you start in the garden room and go to the south, you will end in the                                                                                                                                                                                                                                                                    | conservatory.                                                                                                                                                                                                                               | antechamber.                                                                                                                                                                                                                   |
| Hard Object       | the study is to the south of the screen porch. the cloakroom is to the east of the screen porch. the antechamber is to the west of the cloakroom. there is a cart in the study containing a oat, and a bloodstain. there is a bin in the antechamber containing nothing. there is a carton in the cloakroom containing nothing. there is a container in the cloakroom containing a slingshot. took a oat from the cart in the study. went to the north, then to the east, then to the west. placed it. | there is a cart in the study containing a bloodstain. there is a bin in the antechamber containing nothing. there is a carton in the cloakroom containing nothing. there is a container in the cloakroom containing a slingshot, and a oat. | there is a cart in the study containing a bloodstain. there is a bin in the antechamber containing a oat. there is a carton in the cloakroom containing nothing. there is a container in the cloakroom containing a slingshot. |
